# Supplementary material for: Monitoring of polycyclic aromatic hydrocarbon contamination at four oil spill sites using fluorescence spectroscopy coupled with parallel factor-principal component analysis
Source: Royal Society of Chemistry journal article supplement (doi:10.1039/c8em00493e), 2019-01-01
Supplement: c8em00493e1.pdf [file c8em00493e1.pdf]

# **Monitoring of polycyclic aromatic hydrocarbon contamination at four oil spill sites using fluorescence spectroscopy coupled with parallel factor-principal component analysis**

Fatemeh S. Mirnaghi\*, Natalie P. Pinchin, Zeyu Yang, Bruce P. Hollebone, Patrick Lambert, Carl E. Brown

*Emergencies Science and Technology Section, Environment and Climate Change Canada,  
335 River Rd., Ottawa, K1A0H3*

\*Corresponding author, [fatemeh.mirnaghi@canada.ca](mailto:fatemeh.mirnaghi@canada.ca), Tel: 613 949-0166, Fax: 613 991-9485

## **Supplementary Information**

## Table of contents

### Reagents and materials

### Quality control

**Table S1.** Environmental samples collected from the North Saskatchewan River (NSR), Husky Energy pipeline spill, Lloydminster, SK.

**Table S2.** The list of environmental samples collected from the Gogama Canadian National (CN) derailment site, Gogama, ON.

**Table S3.** The list of environmental samples collected from the SS Arrow and Irving Whale spills.

**Fig. S1** GC-MS concentration ( $\mu\text{g}$  per g of oil) of alkylated PAH groups for the North Saskatchewan River (NSR) Husky Energy pipeline spill source oils and environmental samples.

**Fig. S2.** The original fingerprinting EEM-PARAFAC-PCA classification based on 130 petroleum products, a) with sample code labels and b) with score boundaries.

**Fig. S3.** Fluorescence spectroscopy counterplots of the North Saskatchewan River (NSR) Husky Energy environmental water samples.

**Fig. S4.** Comparison of ratios of EEM-PARAFAC  $F_{\text{max}}$  scores for the North Saskatchewan River (NSR) Husky Energy environmental water samples with the fresh oil after 3, 10, and 15 months post-spill.

**Fig. S5:** Comparison of EEM-PARAFAC  $F_{\text{max}}$  score ratios for the Gogama CN derailment spill source oil and environmental samples.

**Fig. S6.** Water fountains (shown in the black ellipses in photos b and c) have been installed alongside of the rail line to constantly spray water over the areas alongside the track. The residual oils washed out with this excess water are collected in four pools: two on each side of the rail line.

**Fig. S7.** Fluorescence spectroscopy contour plots of water samples collected November 1–2, 2016 (20 months post-spill), from the Gogama derailment spill site.

**Fig. S8.** Comparison of the ratios of EEM-PARAFAC  $F_{\text{max}}$  scores for environmental water samples collected from the Gogama CN derailment site. The description of the samples is provided in Table S2.

**Fig. S9.** Comparison of EEM-PARAFAC  $F_{\text{max}}$  scores of Gogama water samples with their GC-MS PAH concentration

**Fig. S10.** Fluorescence spectroscopy counterplots of the SS Arrow and Irving Whale spill samples.

**Fig. S11.** EEM-PARAFAC  $F_{\text{max}}$  scores of the SS Arrow and Irving Whale spill samples as well as the  $F_{\text{max}}$  scores of Bunker C products used in the fingerprinting model.<sup>1</sup>

## **Reagents and materials**

HPLC grade cyclohexane, dichloromethane, and acetone were purchased from Fisher Scientific (Markham, ON, Canada). Customized mixed PAHs and 610 EPA-priority PAH standards were purchased from Restek (Bellefonte, PA, USA). Dissolved organic matter standards were purchased from Sigma Aldrich (St. Louis, MO, USA).

## **Quality control**

Multiple validation, calibration, and correction steps were applied weekly/daily to ensure the stability of the instrument and the accuracy and reliability of the measurement. The instrument was validated on a weekly basis including checks for wavelength accuracy and reproducibility (Ex. and Em.), spectral band accuracy (Ex and Em), stray light, and water Raman sensitivity (Ex at 350 and 500 nm). Daily quality controls were also performed systematically to evaluate any changes in the instrumental response or any potential contamination in the sample or system: 1) A blank sample of dichloromethane was scanned at the beginning, middle, and end of each day. The intensity of blank background signal and Rayleigh peaks spectra were logged for each run to track changes in the instrument and check for any contamination of the solvent. 2) A mixture of 16 EPA-priority PAH standard (12.5–25 ppb concentration range) was analyzed daily for monitoring instrumental stability, sensitivity and accuracy. 3) Raman scatter peak of water (Ex.: 350 nm, Em.: 380-420 nm) was scanned at beginning, middle, and end of each day. The area of the Raman peak was tracked to monitor the sensitivity, repeatability and accuracy of the instrument performance over time.

All the petroleum and environmental samples were run as duplicates to ensure the repeatability of the analysis. The duplicates having more than 7% deviation in total fluorescence intensity were rejected and re-analyzed.

## Supporting Tables:

**Table S1.** Environmental samples collected from the North Saskatchewan River (NSR), Husky Energy pipeline spill, Lloydminster, SK.

| ESTS Sample # | Collection date | Days after spill | ~Months after spill | Latitude | Longitude  | Distance from point of entry (POE) (km)* | Sample type     | Sample description                                | Note on sampling location | Note on sampling depth     |
|---------------|-----------------|------------------|---------------------|----------|------------|------------------------------------------|-----------------|---------------------------------------------------|---------------------------|----------------------------|
| 3479          | 2016/09/01      | 42               | 1.5                 | 53.37988 | -109.40370 | 11 MC                                    | Oil/Veg/Sed*    | Oily debris                                       | Flat on downriver side    | -                          |
| 3480          | 2016/08/31      | 42               | 1.5                 | 52.58364 | -108.38396 | 90 RB                                    | Oil/Veg/Sed     | A small amount of oil containing trapped sediment | -                         | -                          |
| 3484          | 2016/09/01      | 42               | 1.5                 | 52.98644 | -108.73174 | 83 RB                                    | Oil/Veg/Sed     | Oil/Sed                                           |                           | Top sediment               |
| 3485          | 2016/09/01      | 42               | 1.5                 | 53.39241 | -109.34600 | 7 RB                                     | Oil/Veg/Sed     | Oily debris                                       | -                         | -                          |
| 3487          | 2016/09/01      | 42               | 1.5                 | 53.39241 | -109.34600 | 7 RB                                     | Oil/Veg/Sed     | Large oil mat and woody debris                    | -                         | -                          |
| 3537          | 2016/09/26      | 68               | 2.2                 | 53.39411 | -109.32066 | 16 RB                                    | Oil/Sed         | Fresh oil on sediment                             | -                         | -                          |
| 3556          | 2016/10/13      | 85               | 3                   | 53.39443 | -109.29857 | 18.25 RB                                 | Sed             | Patty                                             | -                         | -                          |
| 3564          | 2016/10/14      | 86               | 3                   | 53.52074 | -109.61769 | Upstream (Deer Creek) RB                 | Water           |                                                   |                           |                            |
| 3567          | 2016/10/14      | 86               | 3                   | 53.02276 | -108.82613 | 78 LB                                    | Oil/Sed         | Patty                                             | Shoreline Sed             | Top (on top of fine sand)  |
| 3570          | 2016/10/14      | 86               | 3                   | 53.02280 | -108.82639 | 78 LB                                    | Oil/Sed         | Tar ball/patty                                    | Shoreline Sed             | Top                        |
| 3660          | 2017/05/09      | 293              | 10                  | 53.39443 | 109.30793  | 18 RB                                    | Oil/Veg         | Patty                                             | -                         | Surface level              |
| 3665          | 2017/05/10      | 294              | 10                  | 53.13116 | -108.94692 | 60 MC                                    | Oil/Sed         | Oil sheen or film on debris                       |                           | Surface level              |
| 3676          | 2017/05/10      | 294              | 10                  | 53.39361 | -109.33102 | 15.8 RB                                  | Water/oil sheen | Sheen of oil on water                             | Floating water            | Surface of water column    |
| 3695          | 2017/05/12      | 296              | 10                  | 52.75740 | -108.26772 | 8.1 RB                                   | Oil/Sed         | Vegetated Oil/Sed                                 | Shoreline Sed             | Top (5 cm)                 |
| 3902          | 2017/10/18      | 455              | 15                  | 53.39437 | -109.29773 | 18.25                                    | Oil/Sed         | Patty                                             | Shoreline Sed             | Surface level              |
| 3903          | 2017/10/18      | 455              | 15                  | 53.39437 | -109.29773 | 18.25                                    | Oil/Sed         | Patty                                             | Shoreline Sed             | Surface level              |
| 3905          | 2017/10/18      | 454              | 15                  | 53.39363 | -109.33086 | 15.5RB                                   | Sed             | Globules                                          | Shoreline Sed             | 0-15 cm from surface level |
| 3912          | 2017/10/18      | 454              | 15                  | 53.37181 | -109.41980 | 10 RB                                    | Water/oil sheen | Sheen of oil on water                             | Floating water            | Surface of water column    |
| 3914          | 2017/10/19      | 455              | 15                  | 53.25082 | -110.00819 | POE RB                                   | Sed             | Patties                                           | Shoreline Sed             | Top (0-5 cm)               |

\* MC: mid-channel; RB: right bank; LB: left bank; Sed: Sediment; Veg: Vegetation

**Table S2.** The list of environmental samples collected from the Gogama Canadian National (CN) derailment site, Gogama, ON.

| Sample # | Collection date | Sample type     | Sample description                                                                                           | Note on sampling location                             |
|----------|-----------------|-----------------|--------------------------------------------------------------------------------------------------------------|-------------------------------------------------------|
| 3584     | 2016/11/01      | Water           | Surface upstream water sample-1                                                                              | Makami River - upstream                               |
| 3585     | 2016/11/01      | Sed*            | River bottom sediment collected by Ponar sampler- significant sheen was produced when sediment was disturbed | Under bridge - Makami River                           |
| 3587     | 2016/11/01      | Water/Oil sheen | Oil sheen and water collated from the water surface caused by disturbing the river bottom                    | Under bridge - Makami River                           |
| 3589     | 2016/11/01      | Water           | Surface upstream water sample-2                                                                              | Makami River - upstream                               |
| 3590     | 2016/11/01      | Water           | Visible rainbow sheen and water collected from surface of the pool                                           | East side of the rail pool                            |
| 3593     | 2016/11/01      | Sed             | River bottom sediment sample collected by Ponar sampler                                                      | Makami River - downstream-shoreline beside the rail   |
| 3604.1   | 2016/11/02      | Oil sheen       | Surface water and oil sheen - the water and oil sheen separated for individual analysis                      | West side train rail pool                             |
| 3604.2   | 2016/11/02      | Water           | Surface water and oil sheen - the water and oil sheen separated for individual analysis                      | West side train rail pool                             |
| 3608     | 2016/11/02      | Sed             | Dark colored sediment sampled from the shore of the pool                                                     | West side of rail shore                               |
| 3612     | 2016/11/02      | Sed             | Surface shoreline out of water                                                                               | North end of guard rail on the east side of the river |

\*Sed:Sediment

**Table S3.** The list of oils and environmental samples collected from the SS Arrow and Irving Whale spills.

| <b>Sample #</b>                    | <b>Collection date</b>  | <b>Sample type</b> | <b>Sample description</b>                                                                  |
|------------------------------------|-------------------------|--------------------|--------------------------------------------------------------------------------------------|
| Oil source Arrow oil-<br>Weathered | Unknown—older than 1992 | Oil                | From ESTS archived samples (Wang et al, 1994)                                              |
| 3048                               | 2015/09/23              | Oil                | Sample from Tank #7 of the SS Arrow (received as oil at water surface)                     |
| 3281                               | 2015/11/01              | Oil                | Sampled from the Tank #9 of the SS Arrow, provided by the Canadian Coast Guard             |
| 3282                               | 2016/06/22              | Oil                | Environmental weathered oil, collected from Black Duck cove shoreline - Chedabucto Bay, NS |
| Irving Whale oil                   | 1996/07/30              | Oil                | Sampled from Tank # 1P, 4P, & 4S of the Irving Whale                                       |

Supplementary Figures:

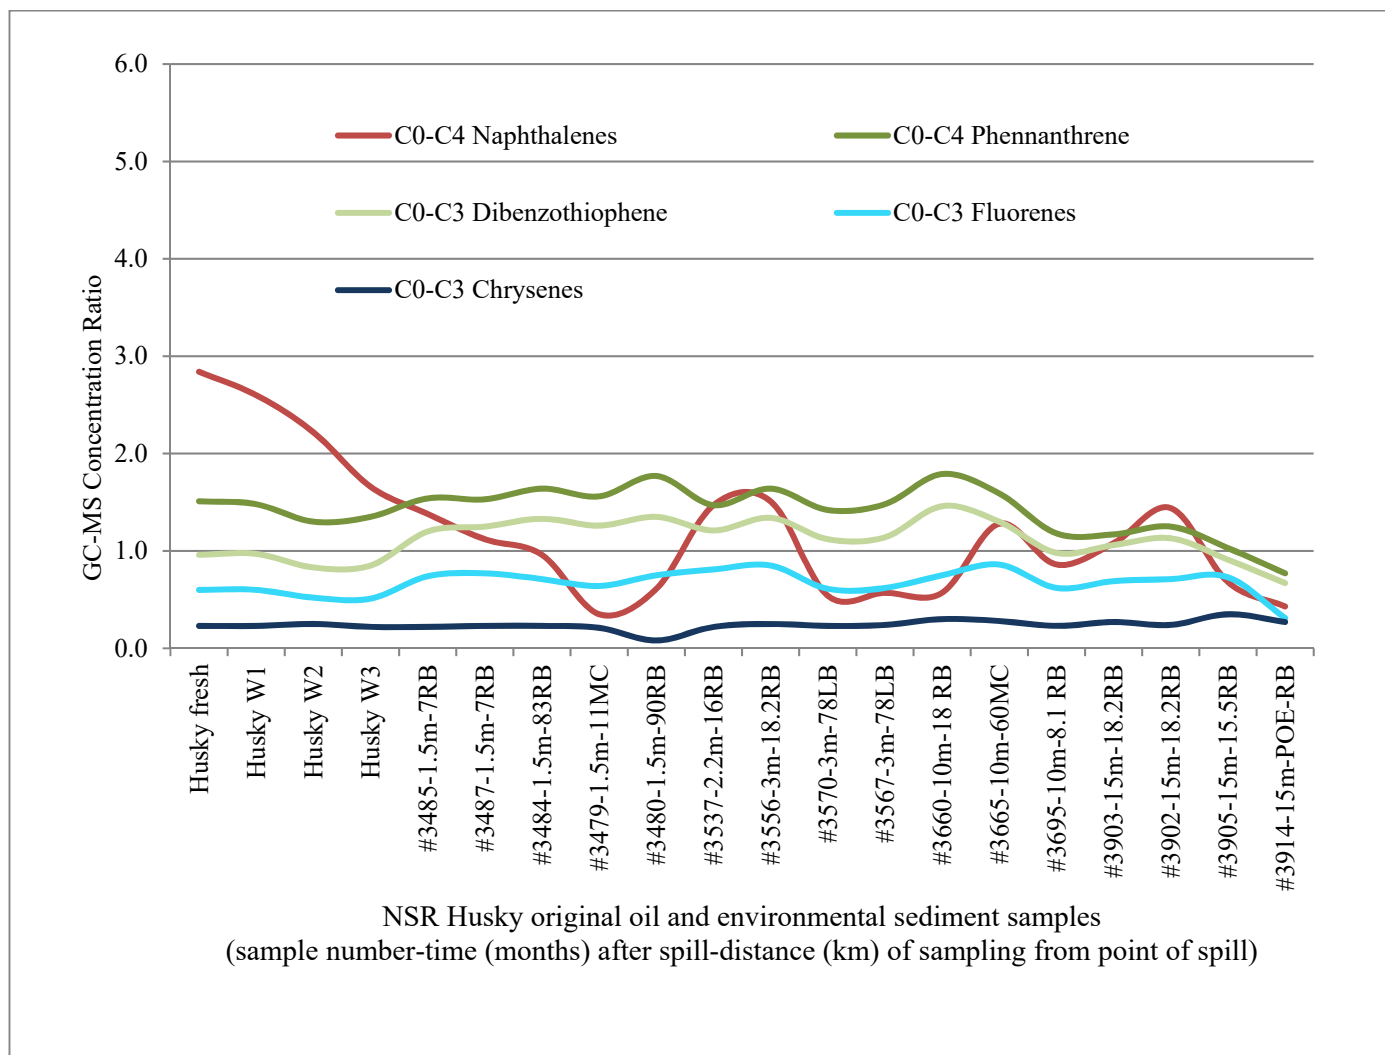

**Fig. S1** Ratio of GC-MS concentration of alkylated PAH groups to sum concentration of selected biomarkers (C29+C30 hopane + C27-29 steranes) for the North Saskatchewan River (NSR) Husky Energy pipeline spill source oils and environmental samples.

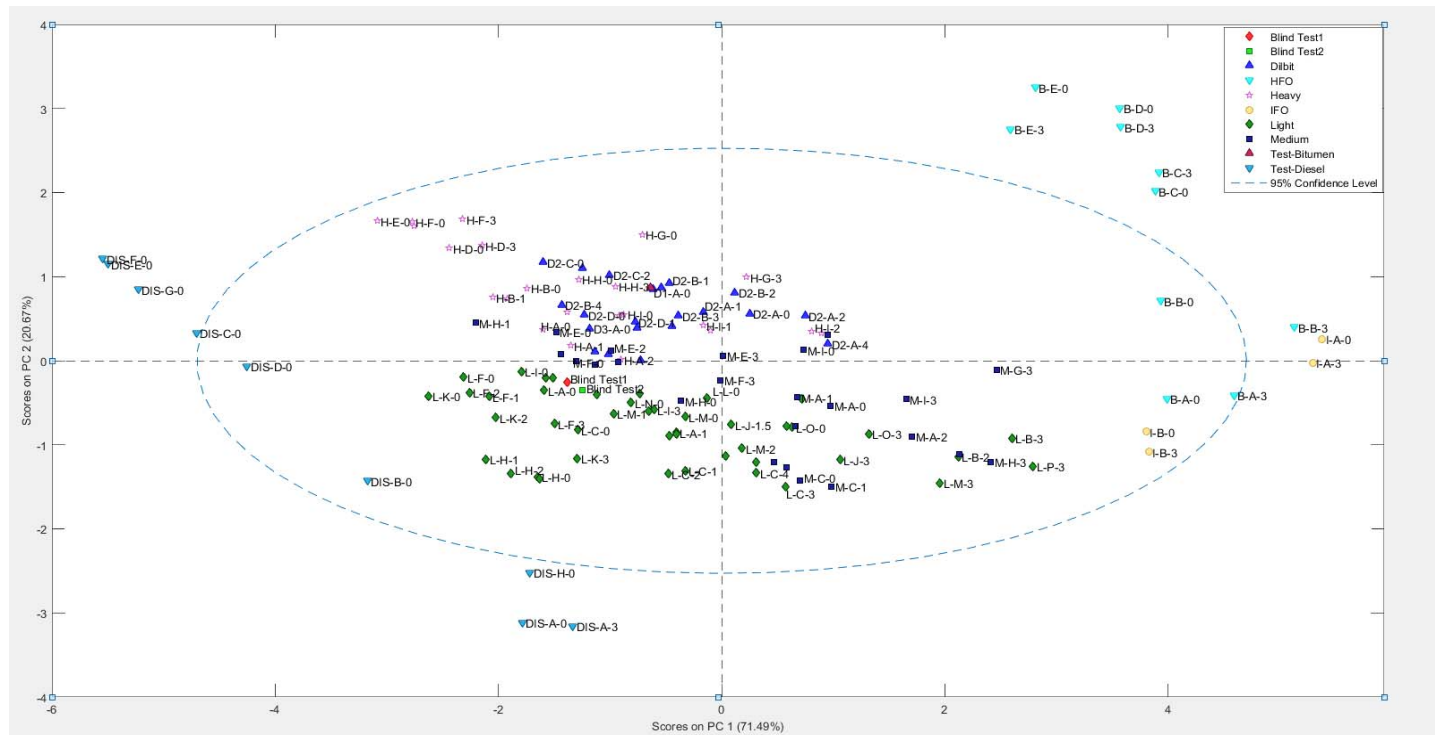

**a**

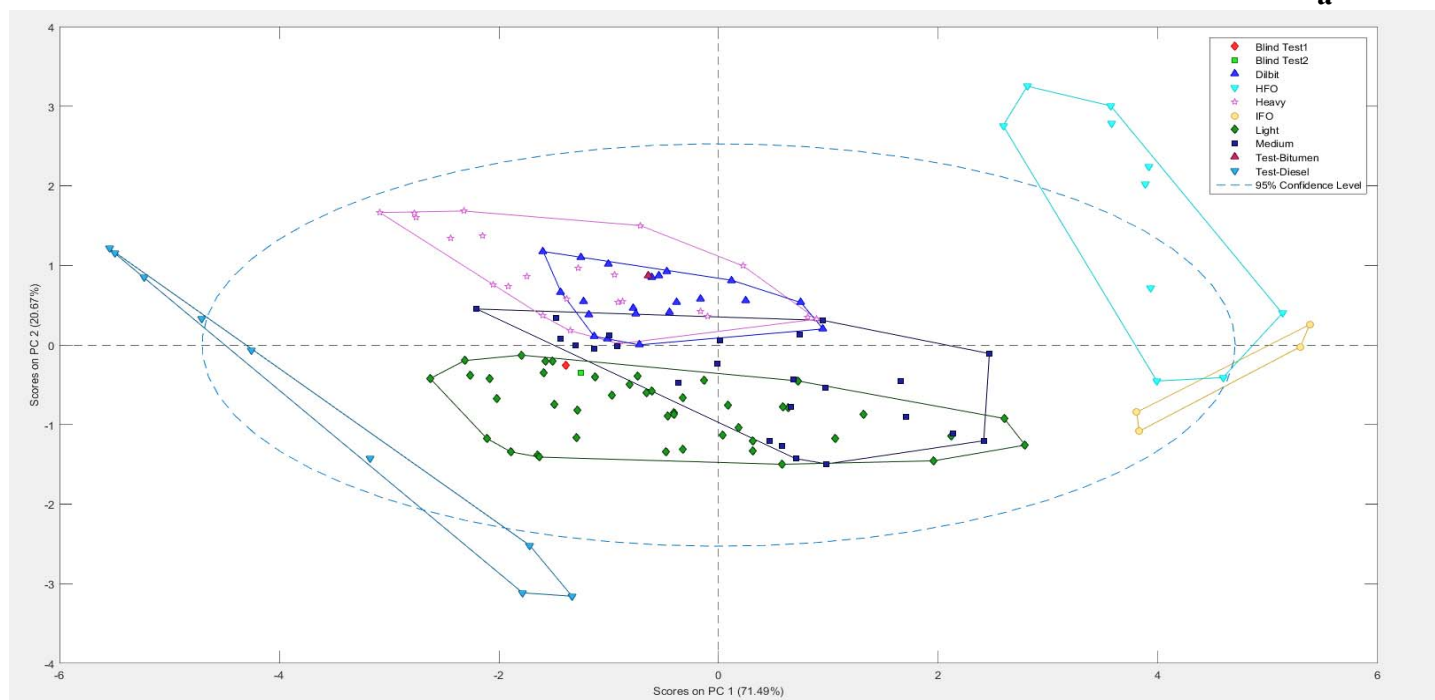

**b**

**Fig. S2:** The original fingerprinting EEM-PARAFAC-PCA classification based on 130 petroleum products, a) with sample code labels and b) with score boundaries. Sample name (letter-letter-number): are derived from first letter indicating the category of oil (L: light crude oil, M: medium crude oil, H: heavy crude oil, B: heavy fuel oil (HFO/Bunkers), I: intermediate fuel oil (IFO), D1: bitumen, D2: dilbit, D3: synbit; DIS: diesel, the second letter indicating the oil within the group; and the number indicating the weathering state of the oil (0: fresh, 1: lightly weathered, 2: moderately weathered, 3: heavily weathered, 4: very heavily weathered). Reprinted with permission from Mirnaghi et. al.<sup>1</sup> The sample name can be decoded using Table S1 in Mirnaghi et. al.



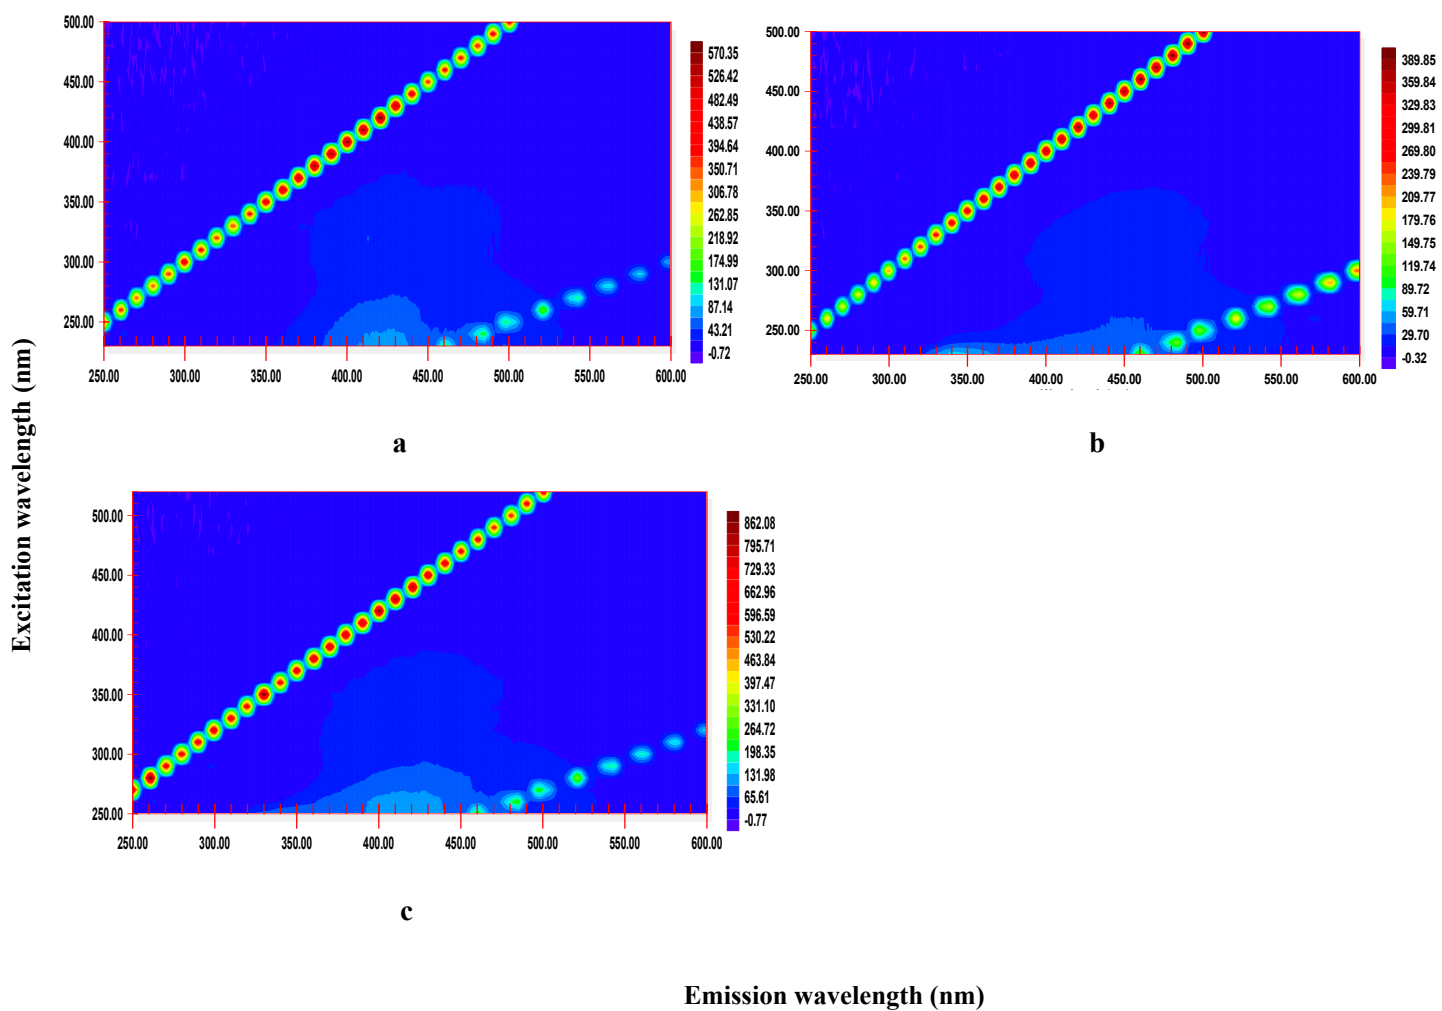

**Fig. S3.** Fluorescence spectroscopy counterplots of the North Saskatchewan River (NSR) Husky Energy environmental water samples a) Sample# 3564 (water collected 3 months post-spill), b) Sample# 3676 (water and oil sheen collected 10 months post-spill), c) Sample #3912 (water and oil sheen collected 15 months post-spill).

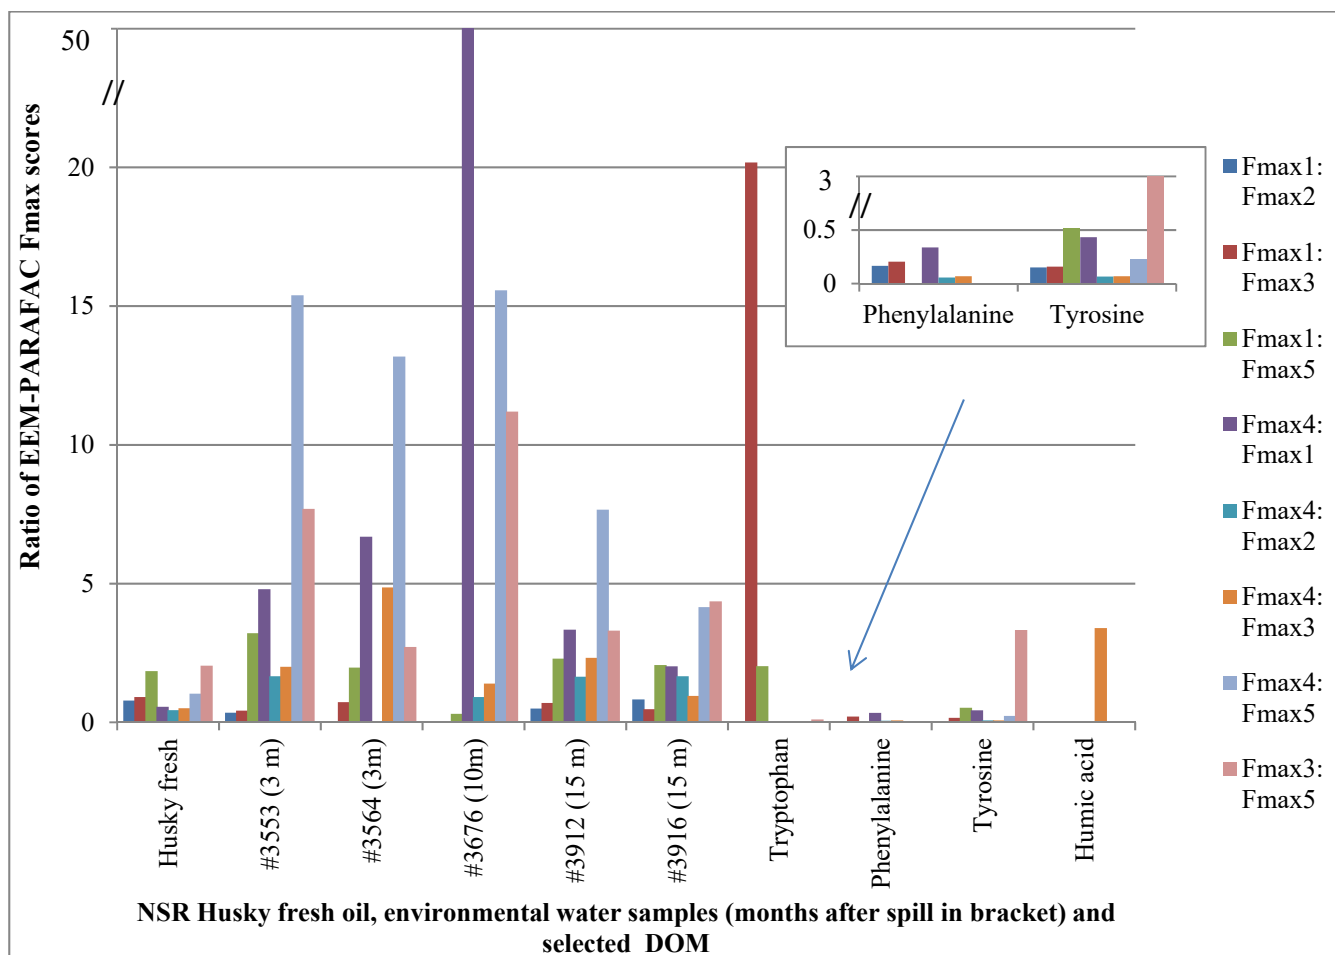

**Fig. S4.** Comparison of ratios of EEM-PARAFAC  $F_{\max}$  scores for the North Saskatchewan River (NSR) Husky Energy environmental water samples (collected after 3, 10, and 15 months after spill) with that of fresh oil as well as selected background dissolved organic matters. Fmax1 to Fmax5 correspond to 4-ring PAHs, 2-ring PAHs, 3-ring PAHs,  $\geq 5$  ring PAHs and lighter 3-ring PAHs, respectively.

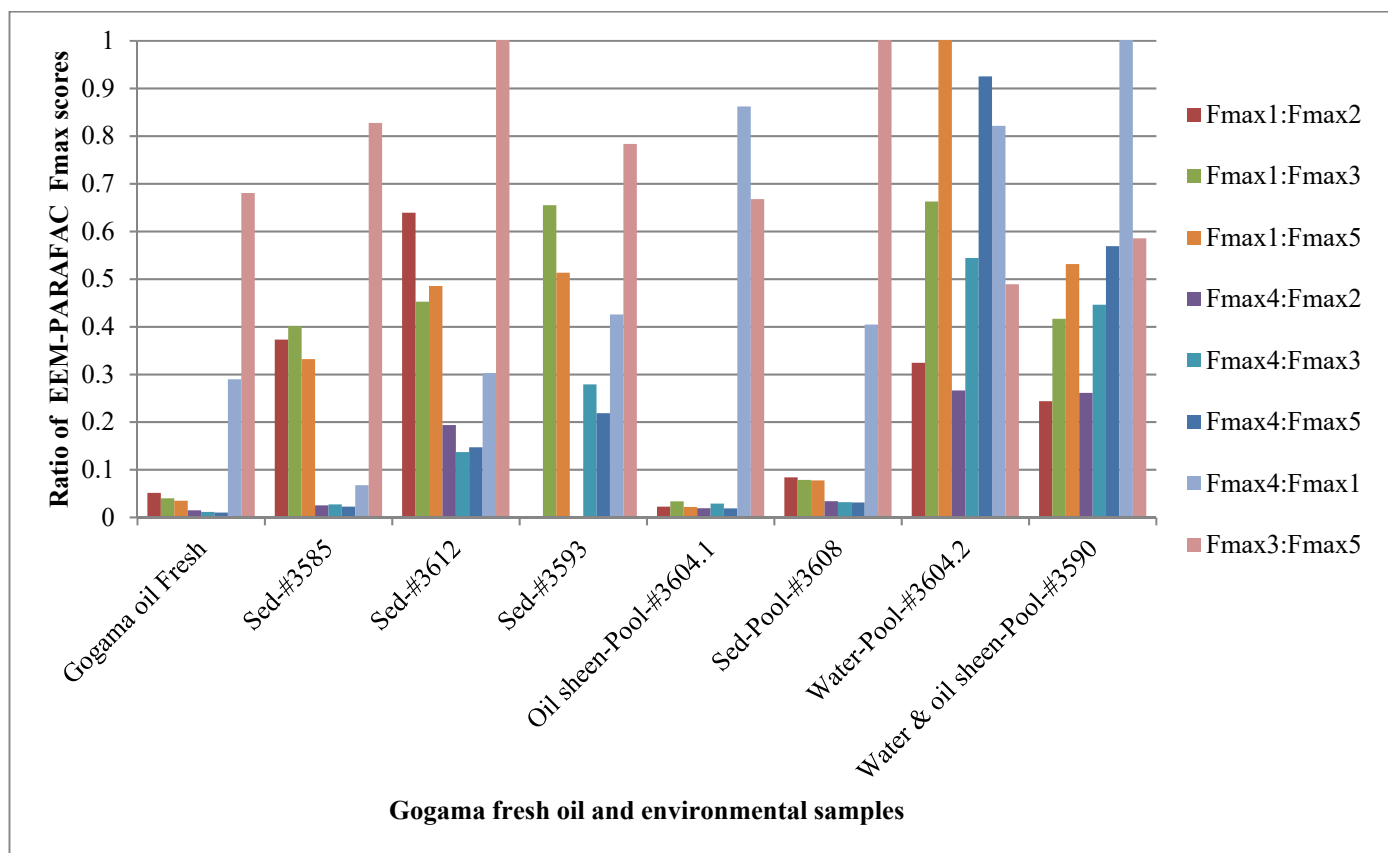

**Fig. S5:** Comparison of EEM-PARAFAC  $F_{\max}$  score ratios for the Gogama CN derailment spill source oil and environmental samples. Fmax1 to Fmax5 correspond to 4-ring PAHs, 2-ring PAHs, 3-ring PAHs,  $\geq 5$  ring PAHs and lighter 3-ring PAHs, respectively.

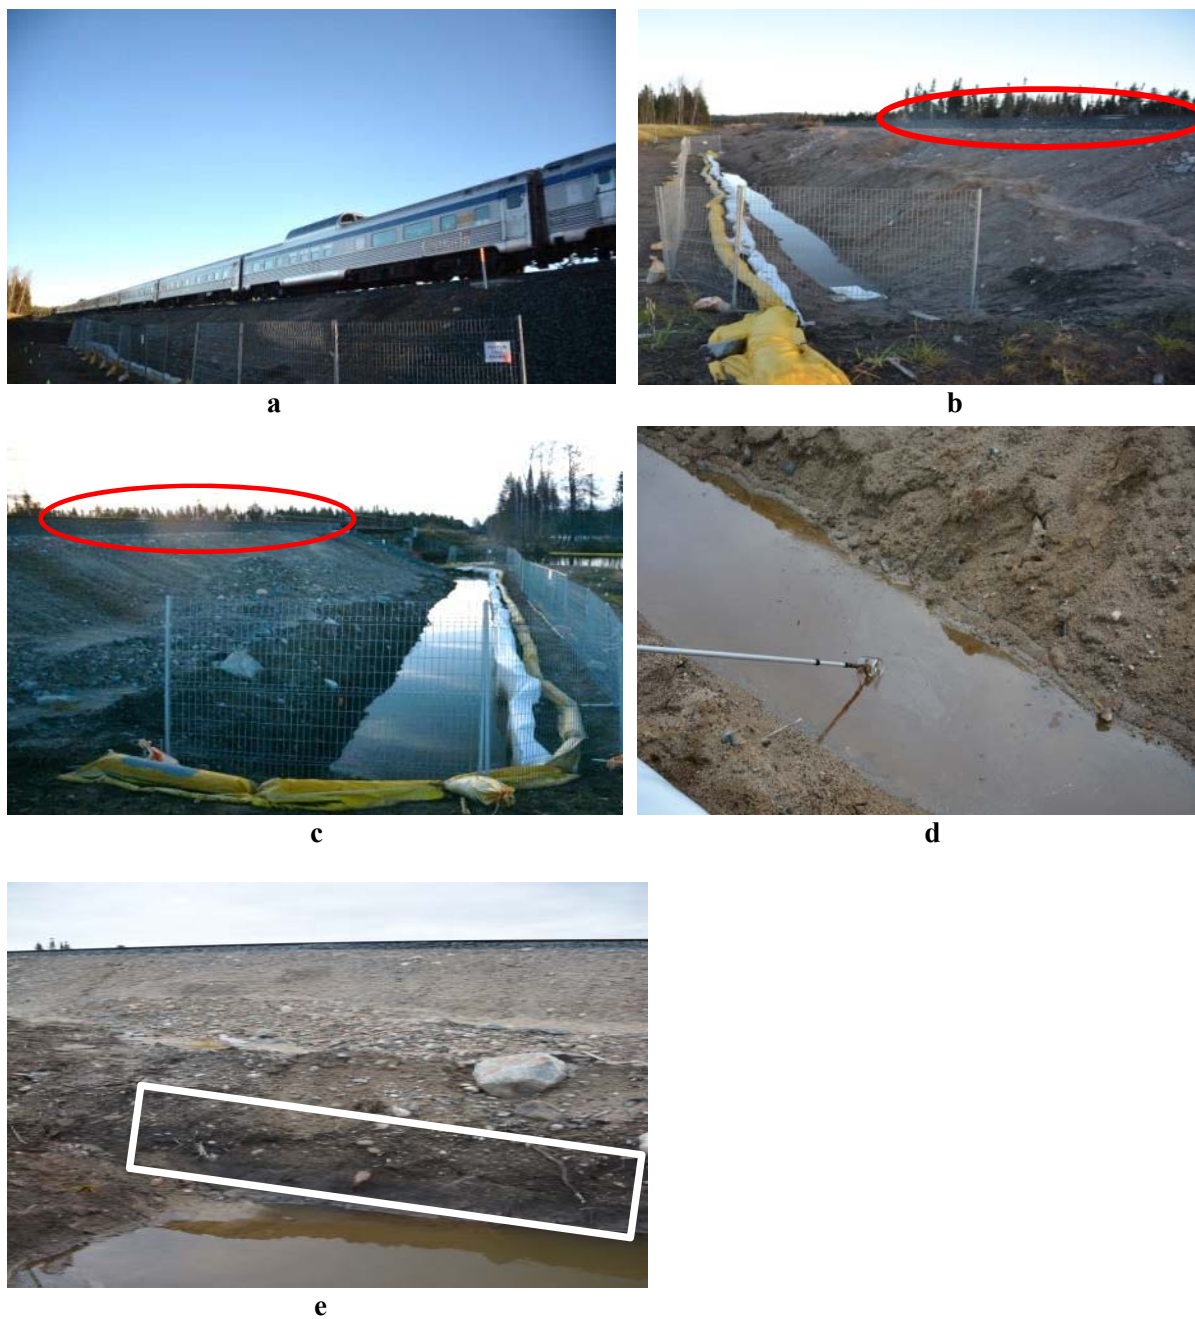

**Fig. S6.** Water fountains (shown in the red ellipses in photos b and c) have been installed alongside of the rail line to constantly spray water over the areas alongside the track. The residual oils washed out with this excess water are collected in four pools: two on each side of the rail line. a) passing train and rail line at the Gogama spill site; b) collection pool on the eastern side of the rail; c) collection pool on the western side of the rail; d) sheen of oil on the water surface of the western pool; e) darkened sediment along the shore of the western collection pool.

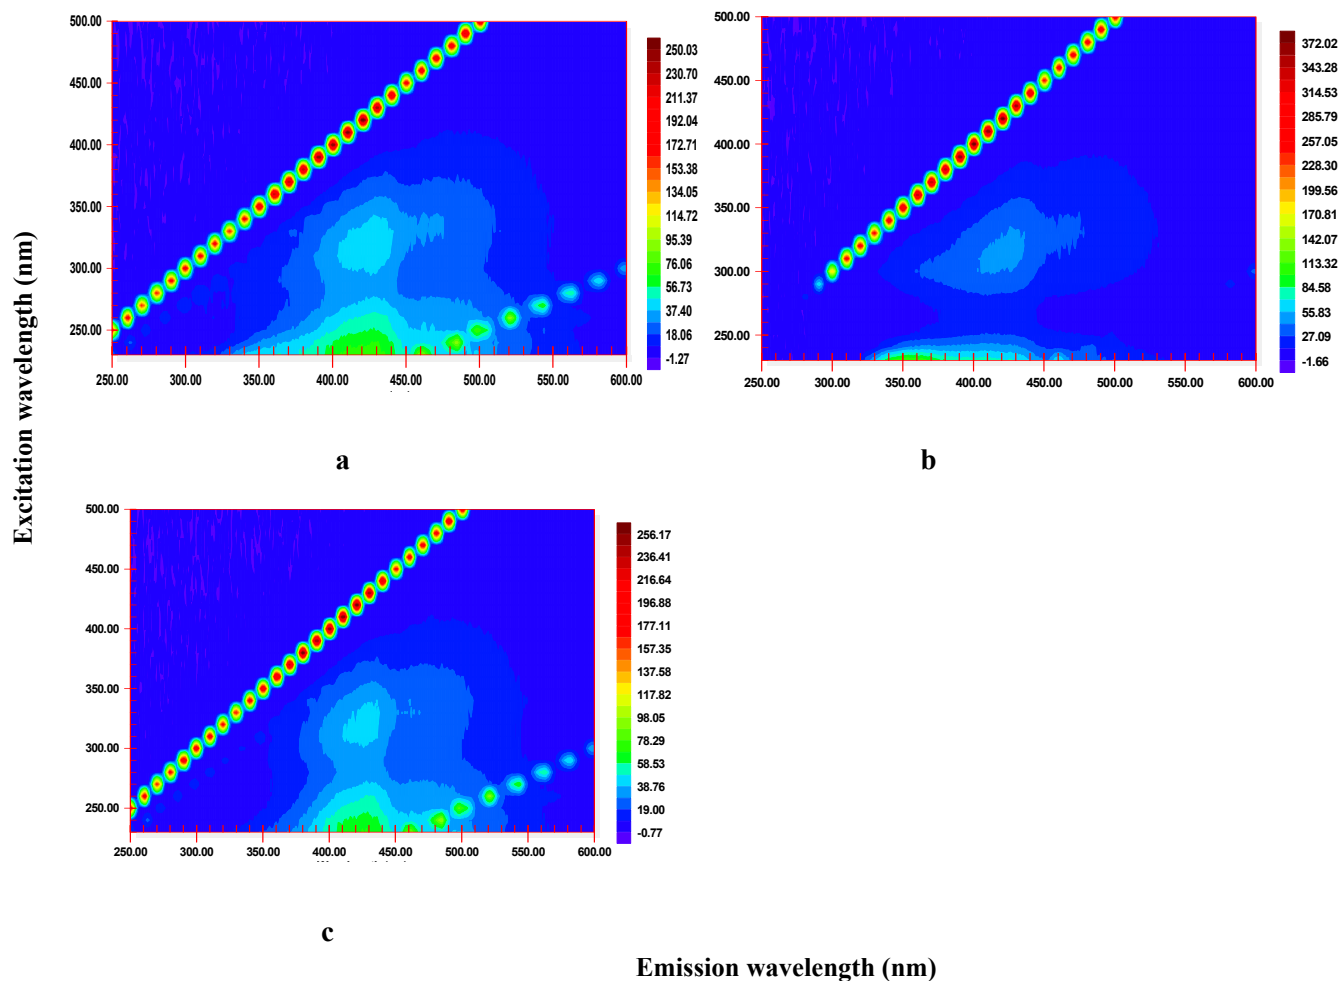

**Fig. S7.** Fluorescence spectroscopy contour plots of water samples collected November 1–2, 2016 (20 months post-spill), from the Gogama derailment spill site. The samples are presented as collected (at different concentrations). a) Sample # 3587 (collected sheen and water from the water surface caused by disturbing the bottom sediment of the Makami River), b) Sample # 3584 (upstream water sample-1 collected from the Makami River), and c) Sample #3589 (upstream water sample-2 collected from the Makami River).

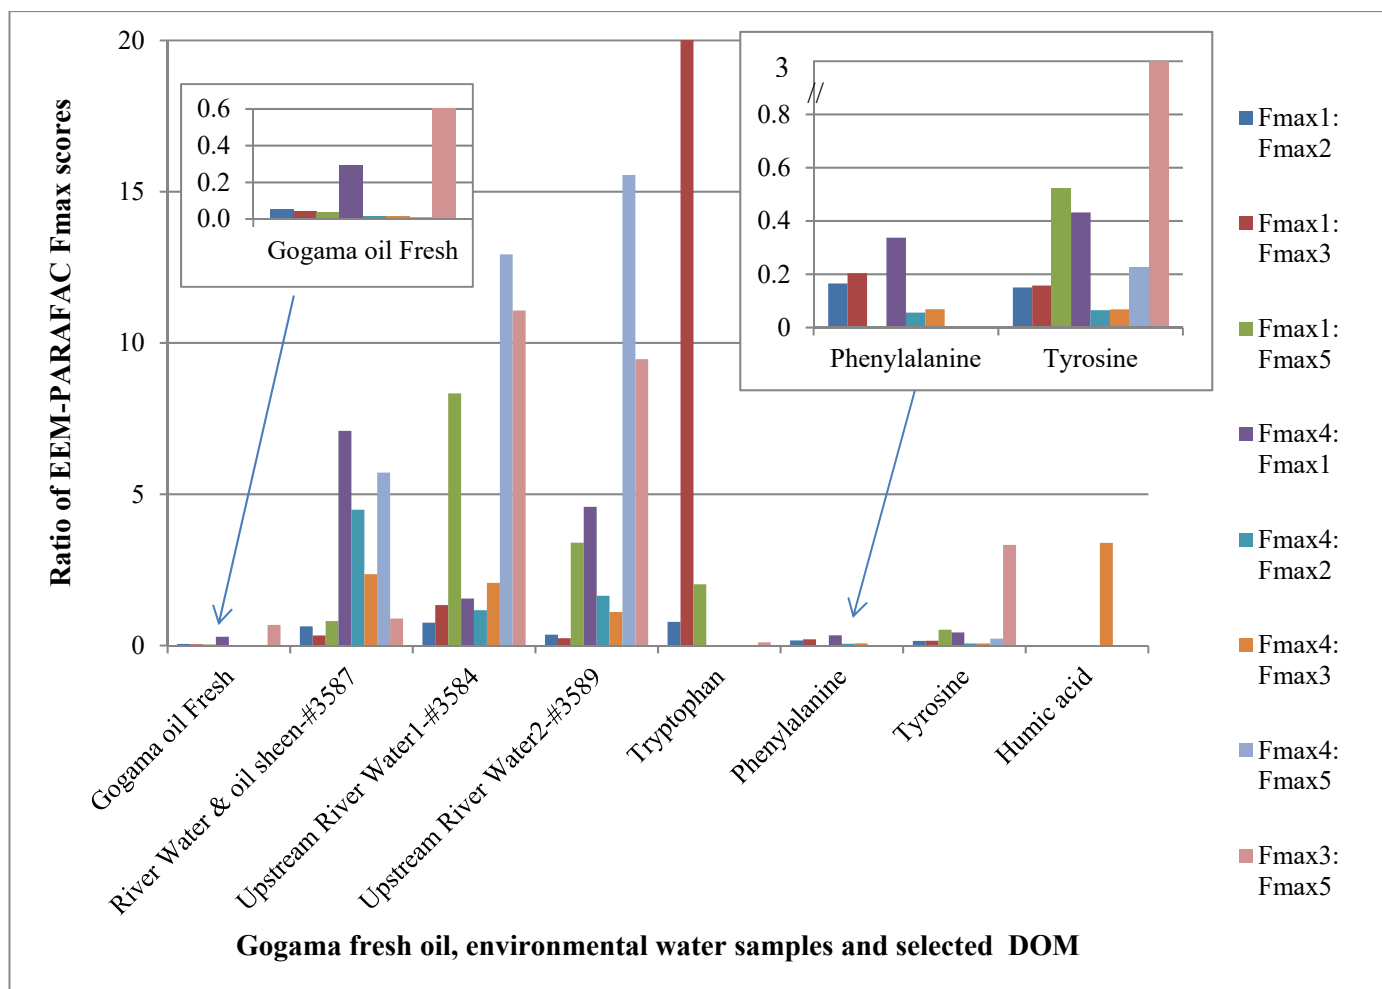

**Fig. S8.** Comparison of the ratios of EEM-PARAFAC  $F_{max}$  scores for environmental water samples collected from the Gogama CN derailment site with that of fresh oil. The description of the samples is provided in Table S2. F1 to F5 correspond to  $F_{max1}$  to  $F_{max5}$  (i.e., 4-ring PAHs, 2-ring PAHs, heavier 3-ring PAHs,  $\geq 5$  ring PAHs and lighter 3-ring PAHs, respectively).

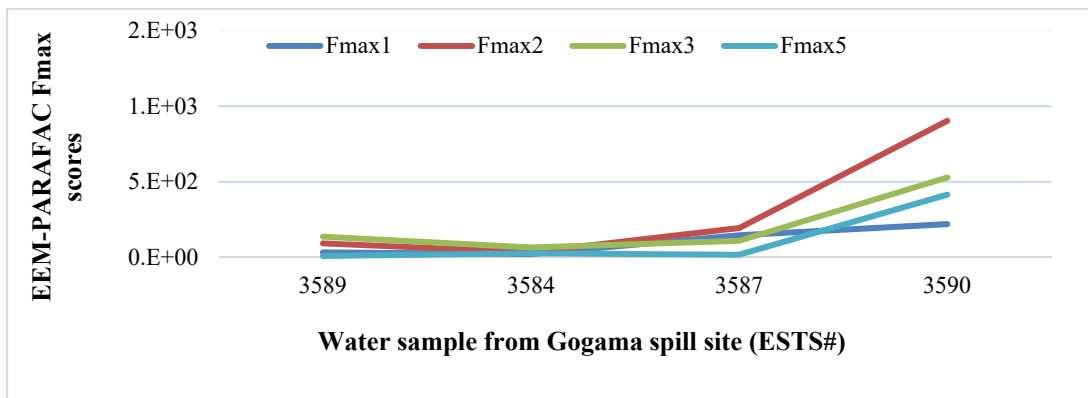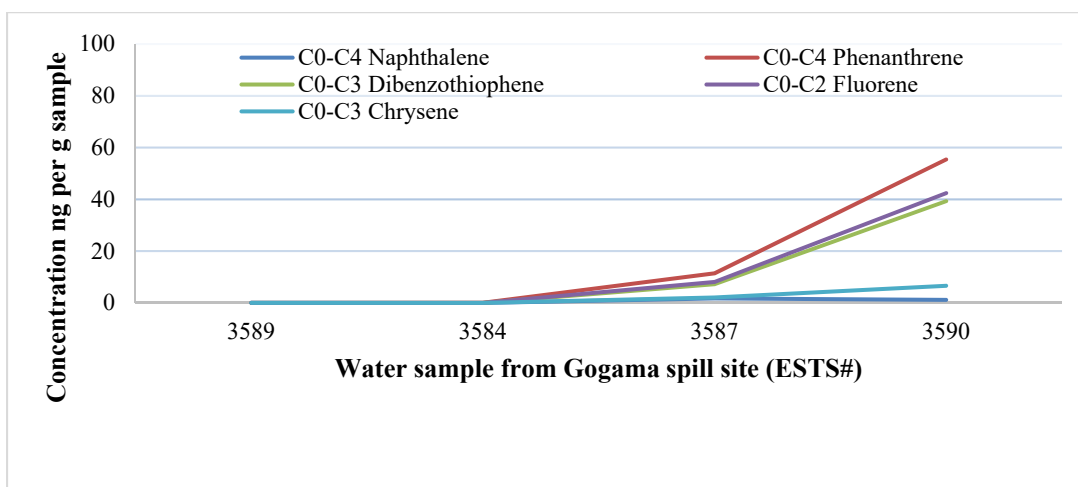

**Fig. S9.** Comparison of the trend of EEM-PARAFAC Fmax scores of Gogama water samples with their GC-MS PAH concentration

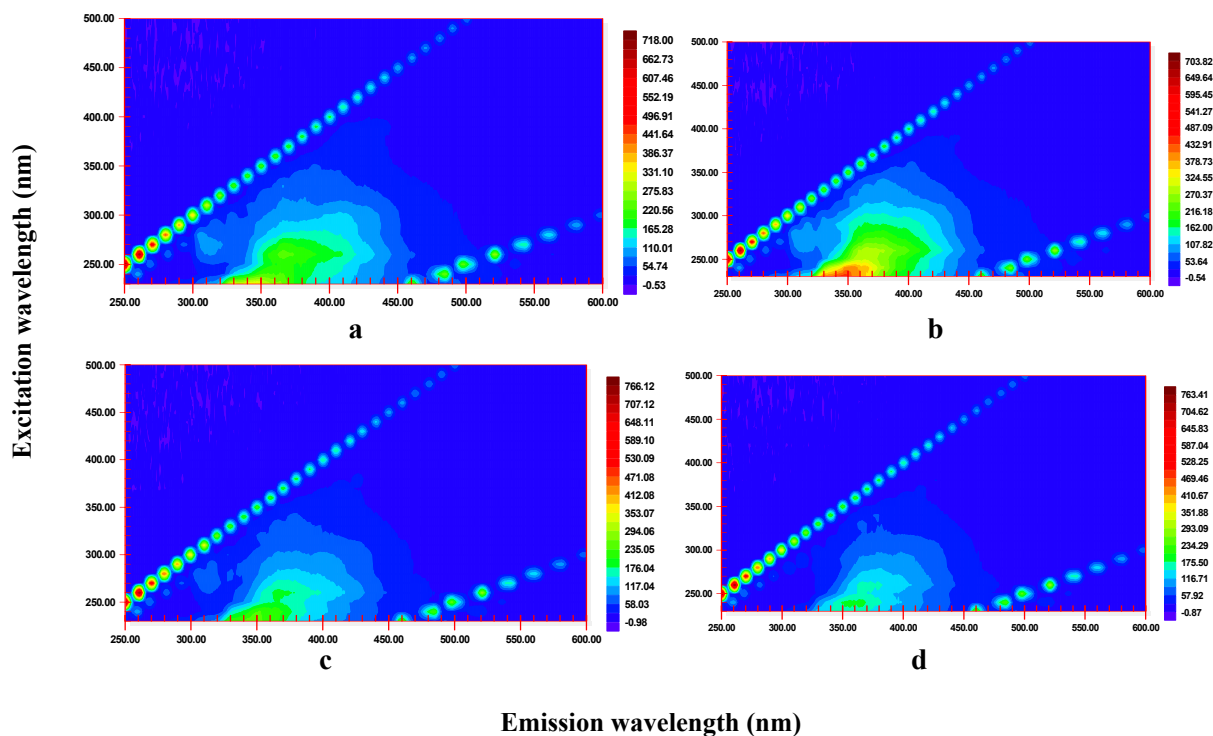

**Fig. S10.** Fluorescence spectroscopy counterplots of the SS Arrow and Irving Whale spill samples. a) 1 ppm Irving Whale oil, sample collected in 1996 from Tank 4S (the results for the 1P and 4S tanks were very similar, therefore were not shown); b) 2 ppm weathered old source SS Arrow oil; c) 1 ppm sample# 3048, sample collected in 2015 from the SS Arrow; d) 1 ppm sample# 3282, environmentally weathered sample collected in 2016 from Duck cove shoreline - Chedabucto Bay, NS.



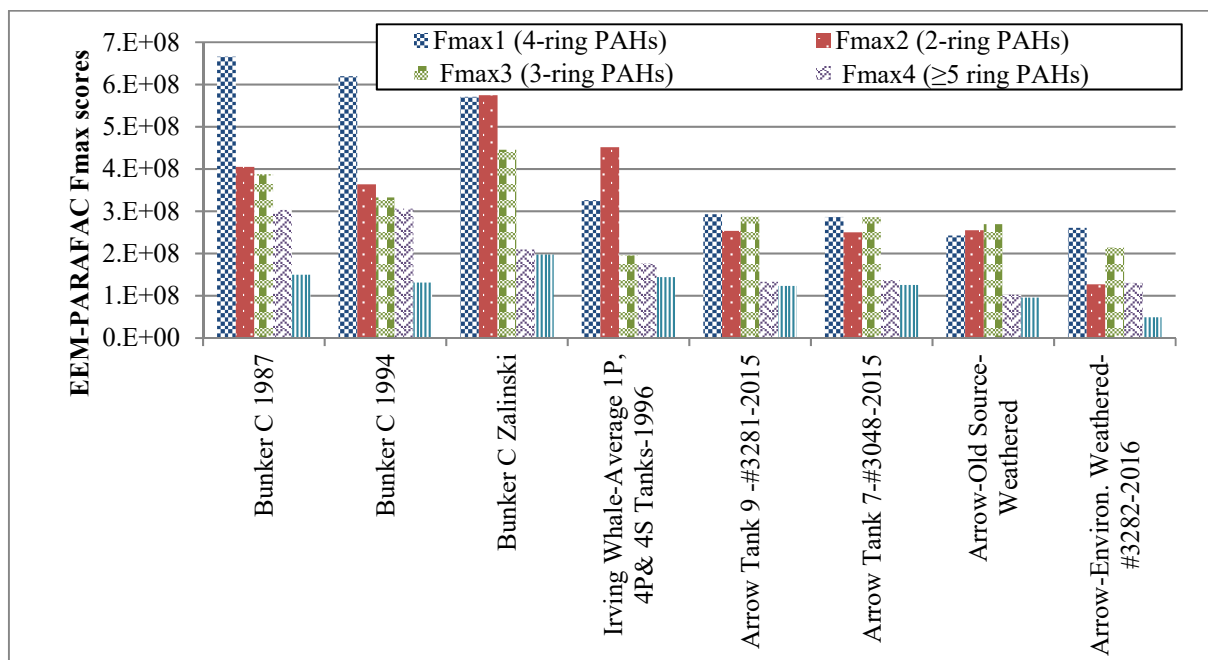

**Fig. S11.** EEM-PARAFAC  $F_{\max}$  scores of the SS Arrow and Irving Whale spill samples as well as the  $F_{\max}$  scores of Bunker C products used in the fingerprinting model.<sup>1</sup>

**Reference:**

- 1 F. S. Mirnaghi, N. Soucy, B. P. Hollebone, C. E. Brown, Rapid fingerprinting of spilled petroleum products using fluorescence spectroscopy coupled with parallel factor and principal component analysis, *Chemosphere*, 2018, 208,185–195.
